# Supplementary material
Source: PubMed Central journal article supplement (PMC6124407)
Supplement: jciinsight-3-121000-s076.pdf [file jciinsight-3-121000-s076.pdf]

## Supplemental data

### Na<sub>v</sub>1.1 inhibition can reduce visceral hypersensitivity

Juan Salvatierra, Joel Castro, Andelain Erickson, Qian Li, Joao Braz, John Gilchrist, Luke Grundy, Grigori Y. Rychkov, Annemie Deiteren, Rana Rais, Glenn F. King, Barbara S. Slusher, Allan Basbaum, Pankaj J Pasricha, Stuart M. Brierley, Frank Bosmans

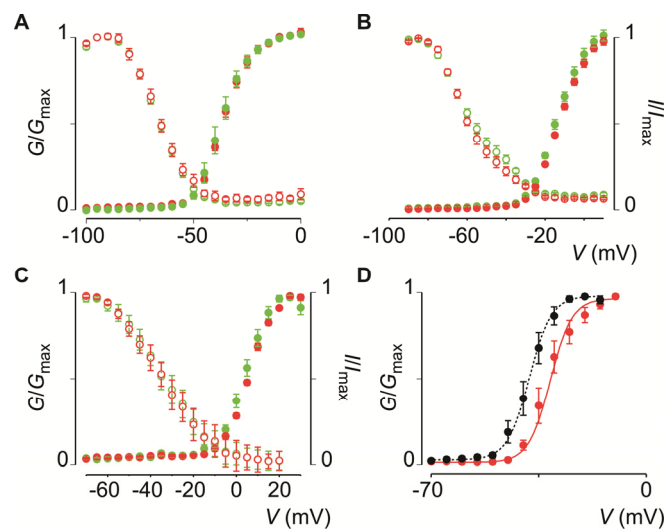

#### Supplementary Figure 1: Effect of 100 $\mu$ M Compound B on Na<sub>v</sub>1.5, Na<sub>v</sub>1.7, and Na<sub>v</sub>1.8

**A-C)** Figure shows  $G/G_{max}$  ( $G$ : conductance) and  $I/I_{max}$  ( $I$ : current) relationships before (green, DMSO control) and after (red) addition of 100 $\mu$ M Compound B to Na<sub>v</sub>1.5 (A), Na<sub>v</sub>1.7 (B), and Na<sub>v</sub>1.8 (C).  $n=5-8$ , and error bars represent SEM. No effects were observed. **D)** Effect of 1 $\mu$ M Compound B (red) on Na<sub>v</sub>1.1 (black; control) activation voltage.

**A**

| Time | Mouse  | Mouse Microsomes |                  | Human  | Human Microsomes |                  | Testo* (Mouse) | Testo* (Human) |
|------|--------|------------------|------------------|--------|------------------|------------------|----------------|----------------|
|      | Plasma | Phase I          | Negative Control | Plasma | Phase I          | Negative Control | Phase I        | Phase I        |
| 0    | 100%   | 100%             | 100%             | 100%   | 100%             | 100%             | 100%           | 100%           |
| 30   | 93%    | 97%              | 96%              | 103%   | 111%             | 107%             | 4%             | 21%            |
| 60   | 93%    | 98%              | 96%              | 85%    | 110%             | 108%             | 0%             | 8%             |

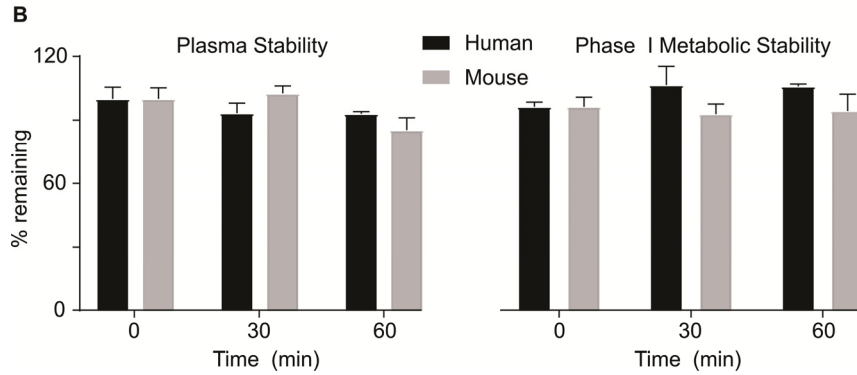

**Supplementary Figure 2: Metabolic stability of Compound B in plasma and liver microsomes**

Compound B was completely stable in both plasma as well as microsomes from mouse and human fortified with NADPH suggesting that the compound is not susceptible to hydrolysis or CYP-450 dependent metabolism. \* Testosterone (Testo) was used as a positive control.

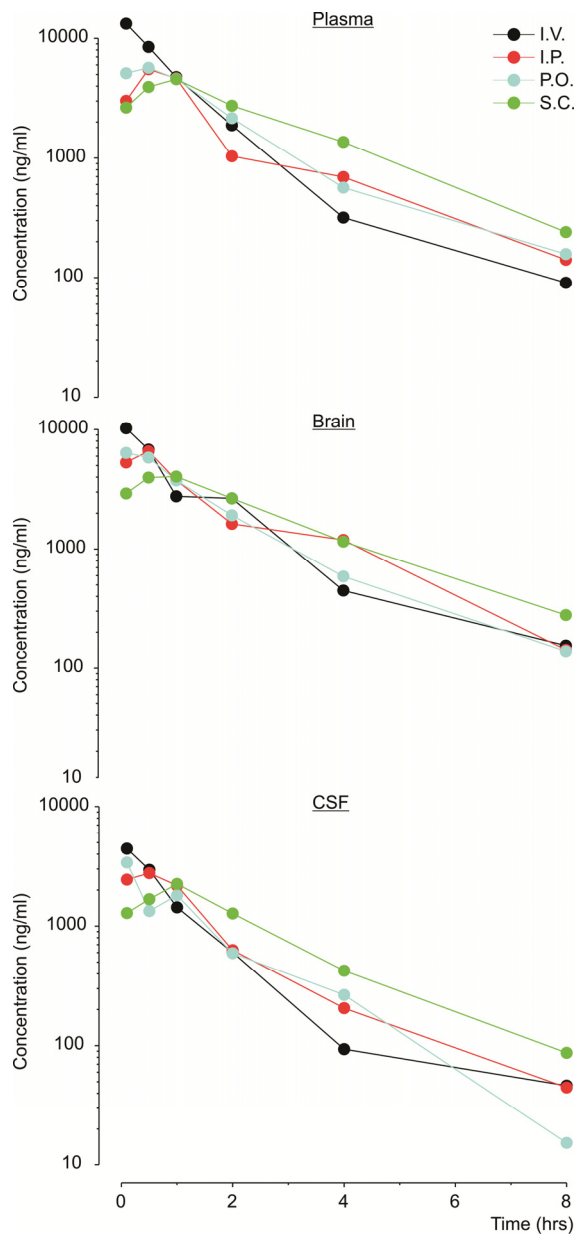

**Supplementary Figure 3: Pharmacokinetic (PK) profile of Compound B**

Figure shows mean concentration (ng/ml) – time (hrs) profiles of plasma, brain, and CSF (cerebrospinal fluid) pharmacokinetics of Compound B in male C57BL/6 mice following a single intravenous (I.V.), intraperitoneal (I.P.), subcutaneous (S.C.), and oral (P.O.) dose administration at 10mg/kg with 6 time points over 8hrs. Deduced values are shown in Supplementary Table 2.

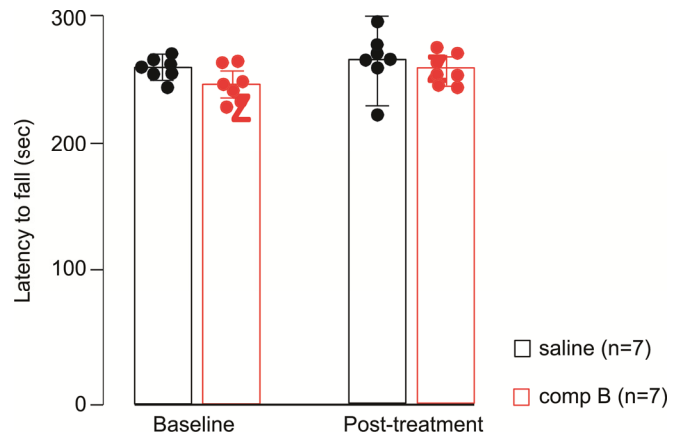

#### Supplementary Figure 4: Compound B assessment in the rotarod test

Systemic administration of Compound B (I.P., 60mg/kg) has no effect on motor performance on the rotarod test (baseline: 256sec  $\pm$  5 vs Compound B: 261sec  $\pm$  4, two-way ANOVA, p=0.990, n=7).

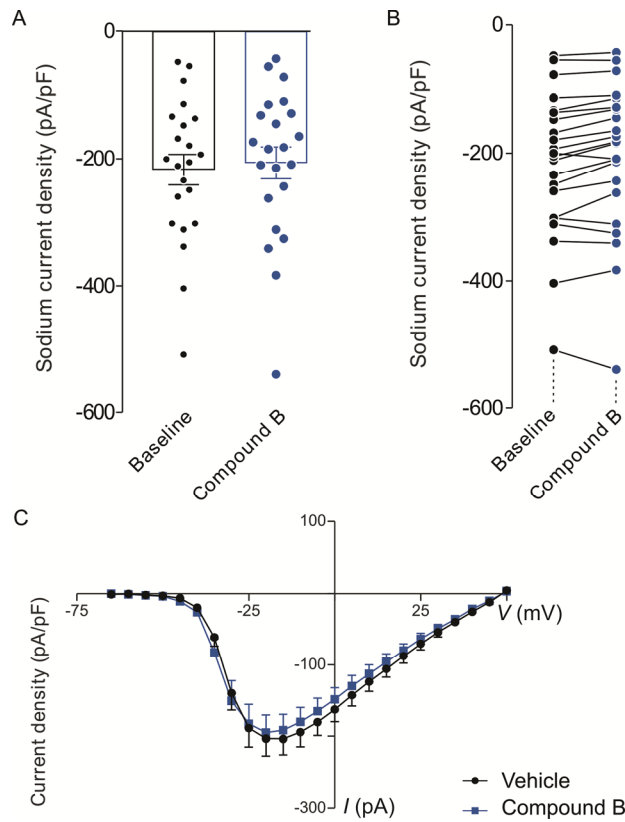

**Supplementary Figure 5: Compound B does not affect sodium currents in a subpopulation of colon-innervating DRG neurons**

**A)** Group data showing that sodium current density (pA/pF) in a population of colon innervating DRG neurons was not inhibited (defined as a  $\geq 15\%$  reduction from baseline responses) by Compound B ( $p > 0.05$ ,  $n = 22$  neurons, paired t-test). **B)** Individual data from the group data presented in A). **C)** *I-V* (current-voltage) plots of sodium current density before (vehicle; black) and after (blue) Compound B application ( $100\mu\text{M}$ ) in uninhibited colon innervating DRG neurons.

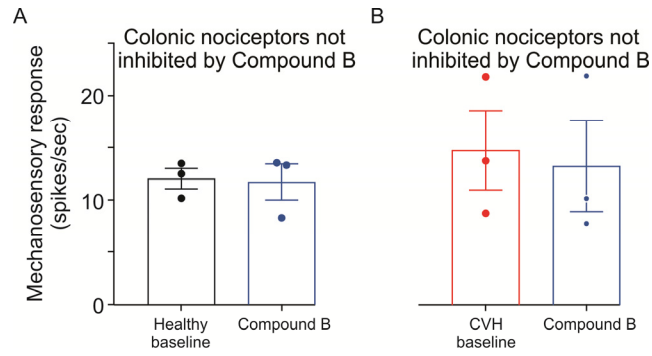

**Supplementary Figure 6: Compound B does not affect a subpopulation of colonic nociceptive afferents from healthy control and CVH mice**

**A)** Healthy control mice: application of Compound B (100 $\mu$ M) did not inhibit a population of nociceptors (n=3, p>0.05, paired t-test). **B)** TNBS colitis-induced CVH mouse model of IBS: application of Compound B (100 $\mu$ M) did not inhibit a population of CVH nociceptors (n=3, p>0.05, paired t-test).

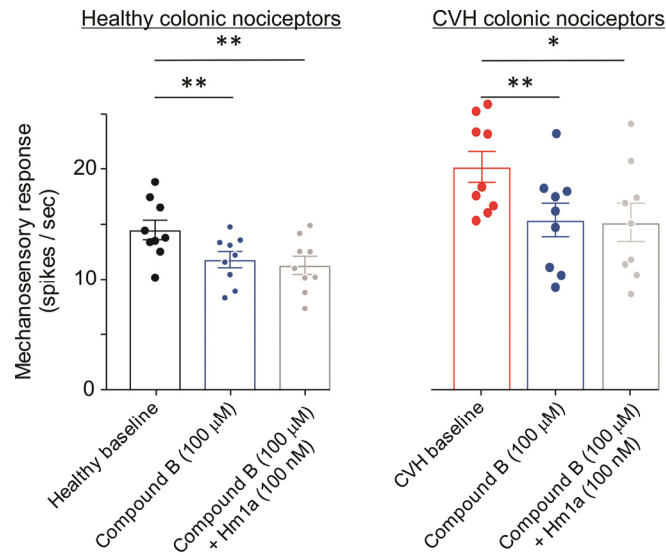

### Supplementary Figure 7: Effect of Compound B and Hm1a on colonic nociceptive afferents

**Left:** Healthy control mice with application of 100μM Compound B inhibiting colonic nociceptors from control mice (n=9 afferents). Addition of 100nM Hm1a does not overcome Compound B inhibition. **Right:** In a TNBS colitis-induced CVH mouse model of IBS, application of Compound B inhibited colonic nociceptors from CVH mice (n=9 afferents). Co-application of 100nM Hm1a does not overcome Compound B inhibition. \* p<0.05; \*\* p<0.01, repeated measures one-way ANOVA.

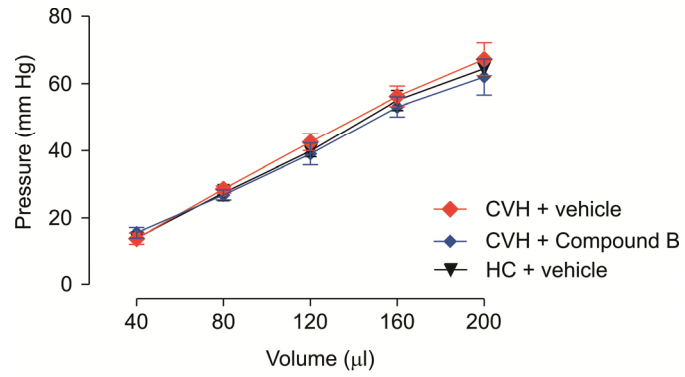

### Supplementary Figure 8: Colonic compliance

Compared with healthy control mice, colonic compliance is unaltered in a TNBS colitis-induced CVH mouse model of IBS or IBS mice dosed with 100μM Compound B, suggesting that changes in the VMR to CRD are not due to changes in smooth muscle function. HC = Healthy Control.



Supplementary Table 1

| Assay                                                          | Source                            | Ligand                                        | Conc.   | Kd     | Non-specific         | Incubation  | Detection method       | Result   |
|----------------------------------------------------------------|-----------------------------------|-----------------------------------------------|---------|--------|----------------------|-------------|------------------------|----------|
| <b>Receptors</b>                                               |                                   |                                               |         |        |                      |             |                        |          |
| A <sub>2A</sub> (h) (agonist radioligand)                      | human recombinant (HEK-293)       | [ <sup>3</sup> H]CGS 21680                    | 6nM     | 27nM   | NECA (10 μM)         | 120min RT   | Scintillation counting | Negative |
| α1A (h) (antagonist radioligand)                               | human recombinant (CHO)           | [ <sup>3</sup> H]prazosin                     | 0.1nM   | 0.1nM  | epinephrine (0.1mM)  | 60min RT    | Scintillation counting | Negative |
| α <sub>2A</sub> (h) (antagonist radioligand)                   | human recombinant (CHO)           | [ <sup>3</sup> H]RX 821002                    | 1nM     | 0.8nM  | epinephrine (100μM)  | 60min RT    | Scintillation counting | Negative |
| β <sub>1</sub> (h) (agonist radioligand)                       | human recombinant (HEK-293)       | [ <sup>3</sup> H](-)CGP 12177                 | 0.3nM   | 0.39nM | alprenolol (50μM)    | 60min RT    | Scintillation counting | Negative |
| β <sub>2</sub> (h) (antagonist radioligand)                    | human recombinant (CHO)           | [ <sup>3</sup> H](-)CGP 12177                 | 0.3nM   | 0.15nM | alprenolol (50μM)    | 120min RT   | Scintillation counting | Negative |
| CB <sub>1</sub> (h) (agonist radioligand)                      | human recombinant (CHO)           | [ <sup>3</sup> H]JCP 55940                    | 0.5nM   | 3.5nM  | WIN 55212-2 (10μM)   | 120min 37°C | Scintillation counting | Negative |
| CB <sub>2</sub> (h) (agonist radioligand)                      | human recombinant (CHO)           | [ <sup>3</sup> H]WIN 55212-2                  | 0.8nM   | 1.5nM  | WIN 55212-2 (5 μM)   | 120min 37°C | Scintillation counting | Negative |
| CCK <sub>1</sub> (CCK <sub>A</sub> ) (h) (agonist radioligand) | human recombinant (CHO)           | [ <sup>125</sup> I]CCK-8s                     | 0.08nM  | 0.24nM | CCK-8s (1μM)         | 60min RT    | Scintillation counting | Negative |
| D <sub>1</sub> (h) (antagonist radioligand)                    | human recombinant (CHO)           | [ <sup>3</sup> H]SCH 23390                    | 0.3nM   | 0.2nM  | SCH 23390 (1μM)      | 60min RT    | Scintillation counting | Negative |
| D <sub>2s</sub> (h) (agonist radioligand)                      | human recombinant (HEK-293)       | [ <sup>3</sup> H]7-OH-DPAT                    | 1nM     | 0.68nM | butaclamol (10μM)    | 60min RT    | Scintillation counting | Negative |
| ET <sub>A</sub> (h) (agonist radioligand)                      | human recombinant (CHO)           | [ <sup>125</sup> I]endothelin-1               | 0.03nM  | 0.03nM | endothelin-1 (100nM) | 120min 37°C | Scintillation counting | Negative |
| H <sub>1</sub> (h) (antagonist radioligand)                    | human recombinant (HEK-293)       | [ <sup>3</sup> H]pyrilamine                   | 1nM     | 1.7nM  | pyrilamine (1μM)     | 60min RT    | Scintillation counting | Negative |
| H <sub>2</sub> (h) (antagonist radioligand)                    | human recombinant (CHO)           | [ <sup>125</sup> I]APT                        | 0.075nM | 2.9nM  | tiotidine (100μM)    | 120min RT   | Scintillation counting | Negative |
| M <sub>1</sub> (h) (antagonist radioligand)                    | human recombinant (CHO)           | [ <sup>3</sup> H]pirenzepine                  | 2nM     | 13nM   | atropine (1μM)       | 60min RT    | Scintillation counting | Negative |
| M <sub>2</sub> (h) (antagonist radioligand)                    | human recombinant (CHO)           | [ <sup>3</sup> H]AF-DX 384                    | 2nM     | 4.6nM  | atropine (1μM)       | 60min RT    | Scintillation counting | Negative |
| M <sub>3</sub> (h) (antagonist radioligand)                    | human recombinant (CHO)           | [ <sup>3</sup> H]4-DAMP                       | 0.2nM   | 0.5nM  | atropine (1μM)       | 60min RT    | Scintillation counting | Negative |
| N neuronal α4β2 (h) (agonist radioligand)                      | SH-SY5Y cells (human recombinant) | [ <sup>3</sup> H]cytisine                     | 0.6nM   | 0.3nM  | nicotine (10μM)      | 120min 4°C  | Scintillation counting | Negative |
| δ (DOP) (h) (agonist radioligand)                              | human recombinant (CHO)           | [ <sup>3</sup> H]DADLE                        | 0.5nM   | 0.73nM | naltrexone (10μM)    | 120min RT   | Scintillation counting | Negative |
| κ (KOP) (agonist radioligand)                                  | rat recombinant (CHO)             | [ <sup>3</sup> H]U 69593                      | 1nM     | 2nM    | naloxone (10μM)      | 60min RT    | Scintillation counting | Negative |
| μ (MOP) (h) (agonist radioligand)                              | human recombinant (HEK-293 cells) | [ <sup>3</sup> H]DAMGO                        | 0.5nM   | 0.35nM | naloxone (10μM)      | 120min RT   | Scintillation counting | Negative |
| 5-HT <sub>1A</sub> (h) (agonist radioligand)                   | human recombinant (HEK-293)       | [ <sup>3</sup> H]8-OH-DPAT                    | 0.5nM   | 0.5nM  | 8-OH-DPAT (10μM)     | 60min RT    | Scintillation counting | Negative |
| 5-HT <sub>1B</sub> (antagonist radioligand)                    | rat cerebral cortex               | [ <sup>125</sup> I]CYP (+ 30μM isoproterenol) | 0.1nM   | 0.16nM | serotonin (10μM)     | 120min 37°C | Scintillation counting | Negative |
| 5-HT <sub>2A</sub> (h)                                         | human                             | [ <sup>125</sup> I](±)DOI                     | 0.1nM   | 0.3nM  | (±)DOI               | 60min RT    | Scintillation          | Negative |

| (agonist radioligand)                                                   | recombinant (HEK-293)         |                                           |              |                                      | (1µM)                  |             | counting               |          |
|-------------------------------------------------------------------------|-------------------------------|-------------------------------------------|--------------|--------------------------------------|------------------------|-------------|------------------------|----------|
| 5-HT <sub>2B</sub> (h) (agonist radioligand)                            | human recombinant (CHO)       | [ <sup>125</sup> I](±)DOI                 | 0.2nM        | 0.2nM                                | (±)DOI (1µM)           | 60min RT    | Scintillation counting | Negative |
| GR (h) (agonist radioligand)                                            | IM-9 cells (cytosol)          | [ <sup>3</sup> H]dexamet hasone           | 1.5nM        | 1.5nM                                | Triamcino-lone (10µM)  | 6hr 4°C     | Scintillation counting | Negative |
| AR (h) (agonist radioligand)                                            | LNCaP cells (cytosol)         | [ <sup>3</sup> H]methyltri enolone        | 1nM          | 0.8nM                                | testosterone (1µM)     | 24hr 4°C    | Scintillation counting | Negative |
| V <sub>1a</sub> (h) (agonist radioligand)                               | human recombinant (CHO)       | [ <sup>3</sup> H]AVP                      | 0.3nM        | 0.5nM                                | AVP (1µM)              | 60min RT    | Scintillation counting | Negative |
| <b>Ion channels</b>                                                     |                               |                                           |              |                                      |                        |             |                        |          |
| BZD (central) (agonist radioligand)                                     | rat cerebral cortex           | [ <sup>3</sup> H]flunitraz epam           | 0.4nM        | 2.1nM                                | diazepam (3µM)         | 60min 4°C   | Scintillation counting | Negative |
| NMDA (antagonist radioligand)                                           | rat cerebral cortex           | [ <sup>3</sup> H]CGP 39653                | 5nM          | 23nM                                 | L-glutamate (100µM)    | 60min 4°C   | Scintillation counting | Negative |
| 5-HT <sub>2</sub> (h) (antagonist radioligand)                          | human recombinant (CHO)       | [ <sup>3</sup> H]BRL 43694                | 0.5nM        | 1.15nM                               | MDL 72222 (10µM)       | 120min RT   | Scintillation counting | Negative |
| Ca <sup>2+</sup> channel (L, dihydro-pyridine) (antagonist radioligand) | rat cerebral cortex           | [ <sup>3</sup> H]nitrendip ine            | 0.1nM        | 0.18nM                               | nitrendipine (1µM)     | 90min RT    | Scintillation counting | Negative |
| Potassium channel hERG (human)- [ <sup>3</sup> H] Dofetilide            | human recombinant (HEK-293)   | [ <sup>3</sup> H] Dofetilide              | 3nM          | 6.6nM                                | Terfenadine (25µM)     | 60min RT    | Scintillation counting | Negative |
| K <sub>v</sub> channel (antagonist radioligand)                         | rat cerebral cortex           | [ <sup>125</sup> I]α-dendrotoxin          | 0.01nM       | 0.04nM                               | α-dendrotoxin (50nM)   | 60min RT    | Scintillation counting | Negative |
| <b>Transporters</b>                                                     |                               |                                           |              |                                      |                        |             |                        |          |
| Nor epinephrine transporter (h) (antagonist radioligand)                | human recombinant (CHO)       | [ <sup>3</sup> H]nisoxe tine              | 1nM          | 2.9nM                                | desipramine (1µM)      | 120min 4°C  | Scintillation counting | Negative |
| dopamine transporter (h) (antagonist radioligand)                       | human recombinant (CHO)       | [ <sup>3</sup> H]BTCP                     | 4nM          | 4.5nM                                | BTCP (10µM)            | 120min 4°C  | Scintillation counting | Negative |
| 5-HT transporter (h) (antagonist radioligand)                           | human recombinant (CHO)       | [ <sup>3</sup> H]imipra mine              | 2nM          | 1.7nM                                | imipramine (10µM)      | 60min RT    | Scintillation counting | Negative |
| <b>Enzymes</b>                                                          |                               |                                           |              |                                      |                        |             |                        |          |
| MAO-A (antagonist radioligand)                                          | rat cerebral cortex           | [ <sup>3</sup> H]Ro 41-1049               | 10nM         | 14nM                                 | clorgyline (1µM)       | 60 min 37°C | Scintillation counting | Negative |
| <b>Kinases and other enzymes</b>                                        |                               |                                           |              |                                      |                        |             |                        |          |
| Assay                                                                   | Source                        | Substrate/stimulus/ tracer                | Incu- bation | Measured component                   | Detection method       | Result      |                        |          |
| Lck kinase (h)                                                          | human recombinant (Sf9 cells) | ATP + Ulight-Poly GAT[EAY(1:1:1)]n (25nM) | 10 min RT    | phospho-Ulight-Poly GAT[EAY(1:1:1)]n | LANCE                  | Negative    |                        |          |
| COX1 (h)                                                                | human recombinant             | Arachidonic acid (3µM) + ADHP (25µM)      | 3min RT      | Resorufin (oxydized ADHP)            | Fluorimetry            | Negative    |                        |          |
| COX2 (h)                                                                | human recombinant (Sf9 cells) | Arachidonic acid (2µM) + ADHP (25µM)      | 5min RT      | Resorufin (oxydized ADHP)            | Fluorimetry            | Negative    |                        |          |
| PDE3A (h)                                                               | human recombinant (Sf9 cells) | [ <sup>3</sup> H]cAMP + cAMP (0.5µM)      | 20min RT     | [ <sup>3</sup> H]5'AMP               | Scintillation counting | Negative    |                        |          |
| PDE4D2 (h)                                                              | human                         | [ <sup>3</sup> H]cAMP + cAMP (0.5µM)      | 20min RT     | [ <sup>3</sup> H]5'AMP               | Scintillation          | Positive    |                        |          |

|                                 |                             |                           |          |                            |            |          |
|---------------------------------|-----------------------------|---------------------------|----------|----------------------------|------------|----------|
|                                 | recombinant (Sf9 cells)     |                           |          |                            | counting   |          |
| <b>acetylcholinesterase (h)</b> | human recombinant (HEK-293) | Acetylthiocholine (400µM) | 30min RT | 5 thio 2 nitrobenzoic acid | Photometry | Negative |

## Supplementary Table 2

| Route       | Matrix             | T <sub>max</sub> (hrs) | C <sub>0</sub> /C <sub>max</sub> (ng/ml) | AUC <sub>last</sub> (ng*hr/ml) | AUC <sub>inf</sub> (ng*hr/ml) | T <sub>1/2</sub> (hrs) | CL (ml/min/kg) | Vss (l/kg) | % F <sup>a</sup> |
|-------------|--------------------|------------------------|------------------------------------------|--------------------------------|-------------------------------|------------------------|----------------|------------|------------------|
| <b>I.V.</b> | Plasma             | -                      | 14442                                    | 15319                          | 15479                         | 1.4                    | 10.8           | 0.8        | -                |
|             | Brain <sup>b</sup> | -                      | 11116                                    | 13861                          | 14151                         | 1.6                    | 11.8           | 1.1        | -                |
|             | CSF                | -                      | 4795                                     | 5016                           | 5111                          | 1.8                    | 32.1           | 2.5        | -                |
| <b>I.P.</b> | Plasma             | 0.5                    | 5523                                     | 10694                          | 11134                         | -                      | -              | -          | -                |
|             | Brain <sup>b</sup> | 0.5                    | 6579                                     | 13505                          | 13878                         | -                      | -              | -          | -                |
|             | CSF                | 0.5                    | 2776                                     | 5179                           | 5277                          | -                      | -              | -          | -                |
| <b>P.O.</b> | Plasma             | 0.5                    | 5681                                     | 12097                          | 12437                         | -                      | -              | -          | 79               |
|             | Brain <sup>b</sup> | 0.25                   | 6371                                     | 11525                          | 11828                         | -                      | -              | -          | -                |
|             | CSF                | 0.25                   | 3397                                     | 4426                           | 4453                          | -                      | -              | -          | -                |
| <b>S.C.</b> | Plasma             | 1.00                   | 4570                                     | 14237                          | 14839                         | -                      | -              | -          | -                |
|             | Brain <sup>b</sup> | 1.00                   | 4041                                     | 14010                          | 14010                         | -                      | -              | -          | -                |
|             | CSF                | 1.00                   | 2248                                     | 6190                           | 6190                          | -                      | -              | -          | -                |

PK data (see Supplementary Fig. 3):

<sup>a</sup> AUC<sub>last</sub> was used for bioavailability calculation.

<sup>b</sup> Brain concentration and exposure expressed as ng/g and ng/g\*hr, density of brain tissue was considered to be 1 which is equivalent to plasma density.
